# Supplementary material for: Rational design of NiMoO4/carbon nanocomposites for high-performance supercapacitors: an in situ carbon incorporation approach
Source: Royal Society of Chemistry journal article supplement (doi:10.1039/d4ya00438h), 2024-11-08
Supplement: d4ya00438h1.pdf [file d4ya00438h1.pdf]

## Rational designing of NiMoO<sub>4</sub>/carbon nanocomposites for high-performance supercapacitors: an *in situ* carbon incorporation approach

Raji Yuvaraja,<sup>a</sup> Sankar Sarathkumar,<sup>a</sup> Venkatesan Gowsalya,<sup>a</sup> Sorna Pandian Anitha Juliet,<sup>a</sup> Selvakumar Veeralakshmi,<sup>b</sup> Siva Kalaiselvam,<sup>b</sup> Gunniya Hariyanandam Gunasekar,<sup>c,d</sup> and Selvan Nehru\*<sup>a</sup>

<sup>a</sup>Department of Physical Chemistry, University of Madras, Guindy Campus, Chennai - 600025, Tamil Nadu, India.

<sup>b</sup>Centre for Industrial Safety, Anna University, Chennai - 600025, Tamil Nadu, India.

<sup>c</sup>Department of Catalysis and Fine Chemicals, CSIR-Indian Institute of Chemical Technology, Hyderabad - 500007, India.

<sup>d</sup>CSIR-Academy of Scientific and Innovative Research (CSIR-AcSIR), Ghaziabad-201002, India.

\*Corresponding author's e-mail: nehruchem@gmail.com

### 1. The calculation for the compositions of NiMoO<sub>4</sub> and carbon components in NiMoO<sub>4</sub>/C (D50) nanocomposite using TGA curves:

At 600 °C:

Wt. retention percentage (x%) of NiMoO<sub>4</sub> = 97.4%

Wt. retention percentage (y%) of CNS = 0.9%

Wt. retention percentage (composite%) of NiMoO<sub>4</sub>/C (D50) = 69.5%

Assume, the proportion of NiMoO<sub>4</sub> and carbon components in the nanocomposite as 'a' and 'b', respectively.

$$a + b = 1 \tag{1}$$

$$x\% \times a + y\% \times b = \text{composite \%} \times 1$$

$$\left(\frac{97.4}{100} \times a\right) + \left(\frac{0.9}{100} \times b\right) = \left(\frac{69.5}{100} \times 1\right)$$

$$0.974a + 0.009b = 0.695 \tag{2}$$

Equation (2) is divided by 0.009

$$\frac{0.974a}{0.009} + \frac{0.009b}{0.009} = \frac{0.695}{0.009}$$

$$108.222 a + b = 77.22 \tag{3}$$

Subtract equation (1) from equation (3), and simplify

$$107.222a + 0 = 76.2$$

$$a = \frac{76.22}{107.222}$$

$$a = 0.711$$

a = 71.1% of NiMoO<sub>4</sub> and b = 28.9% of carbon components.

Therefore, 71.1% of  $\text{NiMoO}_4$  and 28.9% of carbon components are calculated to be in  $\text{NiMoO}_4/\text{C}$  (D50) nanocomposite.

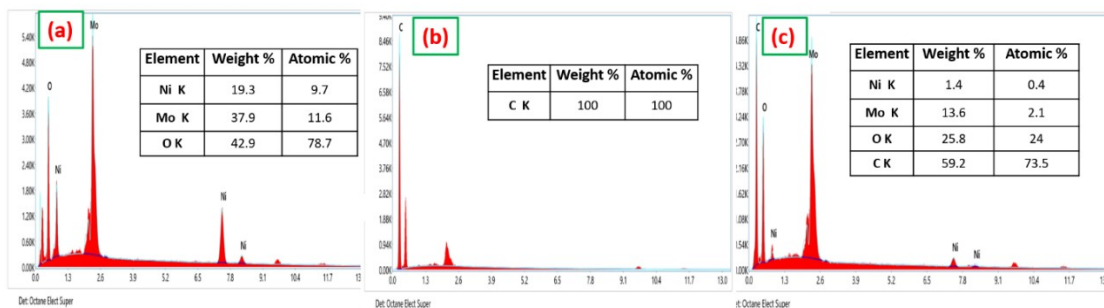

**Fig. S1** EDAX analysis of elements present in the samples: (a)  $\text{NiMoO}_4$ , (b) CNS and (c)  $\text{NiMoO}_4/\text{C}$  (D50).

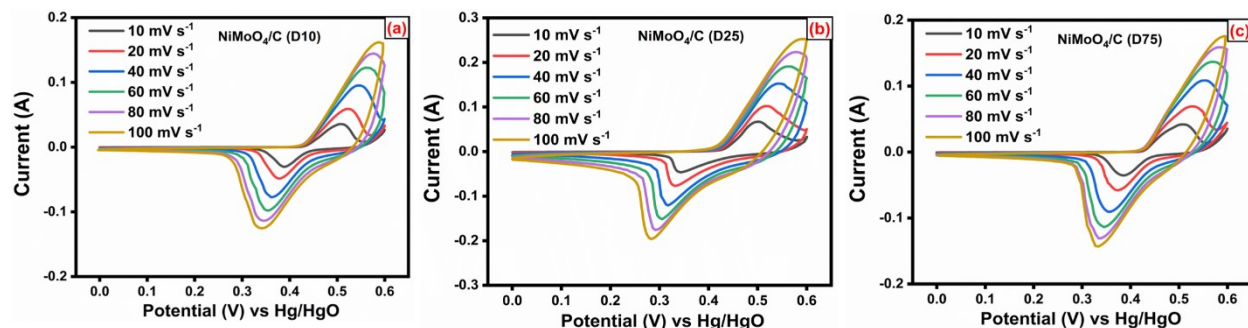

**Fig. S2** CV curves of (a)  $\text{NiMoO}_4/\text{C}$  (D10), (b)  $\text{NiMoO}_4/\text{C}$  (D25) and (c)  $\text{NiMoO}_4/\text{C}$  (D75) at different scan rates (10–100  $\text{mV s}^{-1}$ ).

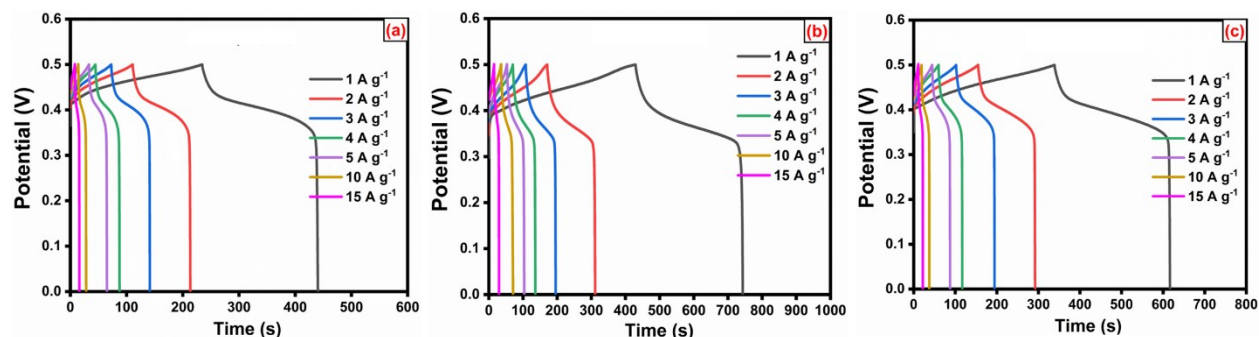

**Fig. S3** GCD curves at different current densities (1–15  $\text{A g}^{-1}$ ): (a)  $\text{NiMoO}_4/\text{C}$  (D10), (b)  $\text{NiMoO}_4/\text{C}$  (D25) and (c)  $\text{NiMoO}_4/\text{C}$  (D75).

**Table S1.** Three electrode specific capacitance of NiMoO<sub>4</sub>, CNS and NiMoO<sub>4</sub>/C based nanocomposites at current density of 1 A g<sup>-1</sup> using 3 M KOH as electrolyte.

| S. No. | Electrode Materials              | Specific capacitance (F g <sup>-1</sup> ) |
|--------|----------------------------------|-------------------------------------------|
| 1      | NiMoO <sub>4</sub>               | 520                                       |
| 2      | CNS                              | 75                                        |
| 3      | NiMoO <sub>4</sub> /C (D10)      | 436                                       |
| 4      | NiMoO <sub>4</sub> /C (D25)      | 583                                       |
| 5      | <b>NiMoO<sub>4</sub>/C (D50)</b> | <b>940</b>                                |
| 6      | NiMoO <sub>4</sub> /C (D75)      | 508                                       |

**Table: S2** Electrical parameters of NiMoO<sub>4</sub>, CNS, and NiMoO<sub>4</sub>/C (D50) electrode materials estimated using ZSimpWin circuit fitting software for EIS experimental data.

| Electrode materials         | R <sub>s</sub> (Ω.cm <sup>2</sup> ) | R <sub>pore</sub> (mΩ.cm <sup>2</sup> ) | R <sub>CT</sub> (Ω.cm <sup>2</sup> ) | Q <sub>c</sub> (S.cm <sup>-2</sup> . s <sup>n</sup> ) | n    | Q <sub>dl</sub> (S.cm <sup>-2</sup> . s <sup>n</sup> ) | n    | W (S.cm <sup>-2</sup> . s <sup>0.5</sup> ) | χ <sup>2</sup> |
|-----------------------------|-------------------------------------|-----------------------------------------|--------------------------------------|-------------------------------------------------------|------|--------------------------------------------------------|------|--------------------------------------------|----------------|
| NiMoO <sub>4</sub>          | 1.15                                | 0.95                                    | 13.02                                | 0.0032                                                | 0.78 | 0.0229                                                 | 0.32 | 4.091×10 <sup>-12</sup>                    | 0.0032         |
| CNS                         | 1.07                                | 57.7                                    | 5.58×10 <sup>-5</sup>                | 0.0012                                                | 0.70 | 0.0005                                                 | 0.90 | 1.034×10 <sup>-4</sup>                     | 0.0007         |
| NiMoO <sub>4</sub> /C (D50) | 1.16                                | 5.48                                    | 2.96                                 | 0.0024                                                | 0.82 | 0.0236                                                 | 0.34 | 6.465×10 <sup>-12</sup>                    | 0.0033         |

R<sub>s</sub> - solution resistance, R<sub>pore</sub> - coating pore resistance, R<sub>ct</sub> - charge transfer resistance, CPE - constant phase element, n - exponent of CPE, W -Warburg impedance and χ<sup>2</sup> - chi-square value.

**Table S3** Comparison of the present work with previously reported NiMoO<sub>4</sub>-based nanomaterials.

| S. No.    | Electrode Materials                                      | Method                                           | Specific capacitance (F g <sup>-1</sup> ) | Cyclic stability (capacity retention % at no. of cycles) | Ref.                      |
|-----------|----------------------------------------------------------|--------------------------------------------------|-------------------------------------------|----------------------------------------------------------|---------------------------|
| 1         | Mn-doped NiMoO <sub>4</sub> /rGO                         | Solvothermal                                     | 689                                       | 96% at 200 cycles                                        | 1                         |
| 2         | NiMoO <sub>4</sub> /rGO nanocomposite                    | Hydrothermal                                     | 1400                                      | 91% at 2000 cycles                                       | 2                         |
| 3         | Hierarchical carbon sphere @NiMoO <sub>4</sub>           | Two-step hydrothermal                            | 268                                       | 88% at 2000 cycles                                       | 3                         |
| 4         | NiMoO <sub>4</sub> /C Composite                          | Hydrothermal                                     | 325                                       | 56% at 10000 cycles                                      | 4                         |
| 5         | NiMoO <sub>4</sub> /carbon composites                    | Solvothermal                                     | 805                                       | 92% at 6000 cycles                                       | 5                         |
| 6         | g-C <sub>3</sub> N <sub>4</sub> /NiMoO <sub>4</sub>      | Chemical precipitation                           | 398                                       | 70% at 4000 cycles                                       | 6                         |
| 7         | NiMoO <sub>4</sub> /reduced graphene oxide composite     | Hydrothermal method                              | 680                                       | 68% at 4000 cycles                                       | 7                         |
| 8         | NiMoO <sub>4</sub> nanorods and hierarchical nanospheres | Facile hydrothermal                              | 974                                       | 91% at 5000 cycles                                       | 8                         |
| 9         | Carbon nanofibers/NiMoO <sub>4</sub> nanoparticles       | Electrospinning                                  | 1438                                      | 92% at 3000 cycles                                       | 9                         |
| 10        | Ni-doped MnMoO <sub>4</sub>                              | One-step hydrothermal method                     | 2315                                      | 96 % at 5000 cycles                                      | 10                        |
| 11        | NiMoO <sub>4</sub> /rGO nanocomposite                    | Hydrothermal method                              | 1516                                      | 96% at 10000 cycles                                      | 11                        |
| 12        | NiCo <sub>2</sub> S <sub>4</sub> /NiMoO <sub>4</sub>     | Hydrothermal method                              | 2323                                      | 90% at 10000 cycles                                      | 12                        |
| 13        | NiMoO <sub>4</sub> @CoMoO <sub>4</sub>                   | Hydrothermal method                              | 1282                                      | 76% at 1000 cycles                                       | 13                        |
| <b>14</b> | <b>NiMoO<sub>4</sub>/C (D50)</b>                         | <b><i>In situ</i> Hydrothermal carbonization</b> | <b>940</b>                                | <b>71% at 5000 cycles</b>                                | <b><i>This report</i></b> |

## References

1. J. Yuan, D. Yao, L. Jiang, Y. Tao, J. Che, G. He and H. Chen, *ACS Appl. Energy Mater.*, 2020, **3**, 1794-1803.
2. S. Hussain, M. S. Javed, S. Asim, A. Shaheen, A. J. Khan, Y. Abbas, N. Ullah, A. Iqbal, M. Wang, G. Qiao and S. Yun, *Ceram. Int.*, 2020, **46**, 6406-6412.
3. E. Murugan, S. Govindaraju and S. Santhoshkumar, *Electrochim. Acta*, 2021, **392**, 138973.
4. C. Wei, Y. Huang, J. Yan, X. Chen and X. Zhang, *Ceram. Int.*, 2016, **42**, 15694-15700.
5. B. Tong, W. Wei, X. Chen, J. Wang, W. Ye, S. Cui, W. Chen and L. Mi, *CrystEngComm*, 2019, **21**, 5492-5499.
6. S.-W. Zhang, B.-S. Yin, C. Liu, Z.-B. Wang and D.-M. Gu, *Appl. Surf. Sci.*, 2018, **458**, 478-488.
7. X. Xu, Q. Liu, T. Wei, Y. Zhao and X. Zhang, *J. Mater. Sci.: Mater. Electron.*, 2019, **30**, 5109-5119.

8. D. Muthu, S. Vargheese, Y. Haldorai and R. T. Rajendra Kumar, *Mater. Sci. Semicond. Process.*, 2021, **135**, 106078.
9. V. S. Budhiraju, R. Kumar, A. Sharma and S. Sivakumar, *Electrochim. Acta*, 2017, **238**, 337-348.
10. M. Li, M. Du, Y. Zou, F. Yang and W. Dong, *J. Energy Storage*, 2024, **97**, 112791.
11. M. Beemaroo, P. Kanagambal, K. Ravichandran, P. Rajeswaran, I. M. Ashraf, U. Chalapathi and S.-H. Park, *Inorg. Chem. Commun.*, 2023, **153**, 110853.
12. B. Ren, X. Zhang, H. An, S. Ding, H. Zhang, X. Zeng, X. e. Wang, M. Fan and X. Yang, *J. Energy Storage*, 2023, **59**, 106553.
13. L. Chang, S. Chen, Y. Fei, D. J. Stacchiola and Y. H. Hu, *Proc. Natl. Acad. Sci.*, 2023, **120**, e2219950120.
